# Supplementary material for: A new piece in the puzzle of the novel avian-origin influenza A (H7N9) virus
Source: PubMed Central journal article supplement (PMC4016609; doi:10.1186/1745-6150-8-26), 2013-10-26

S1-A

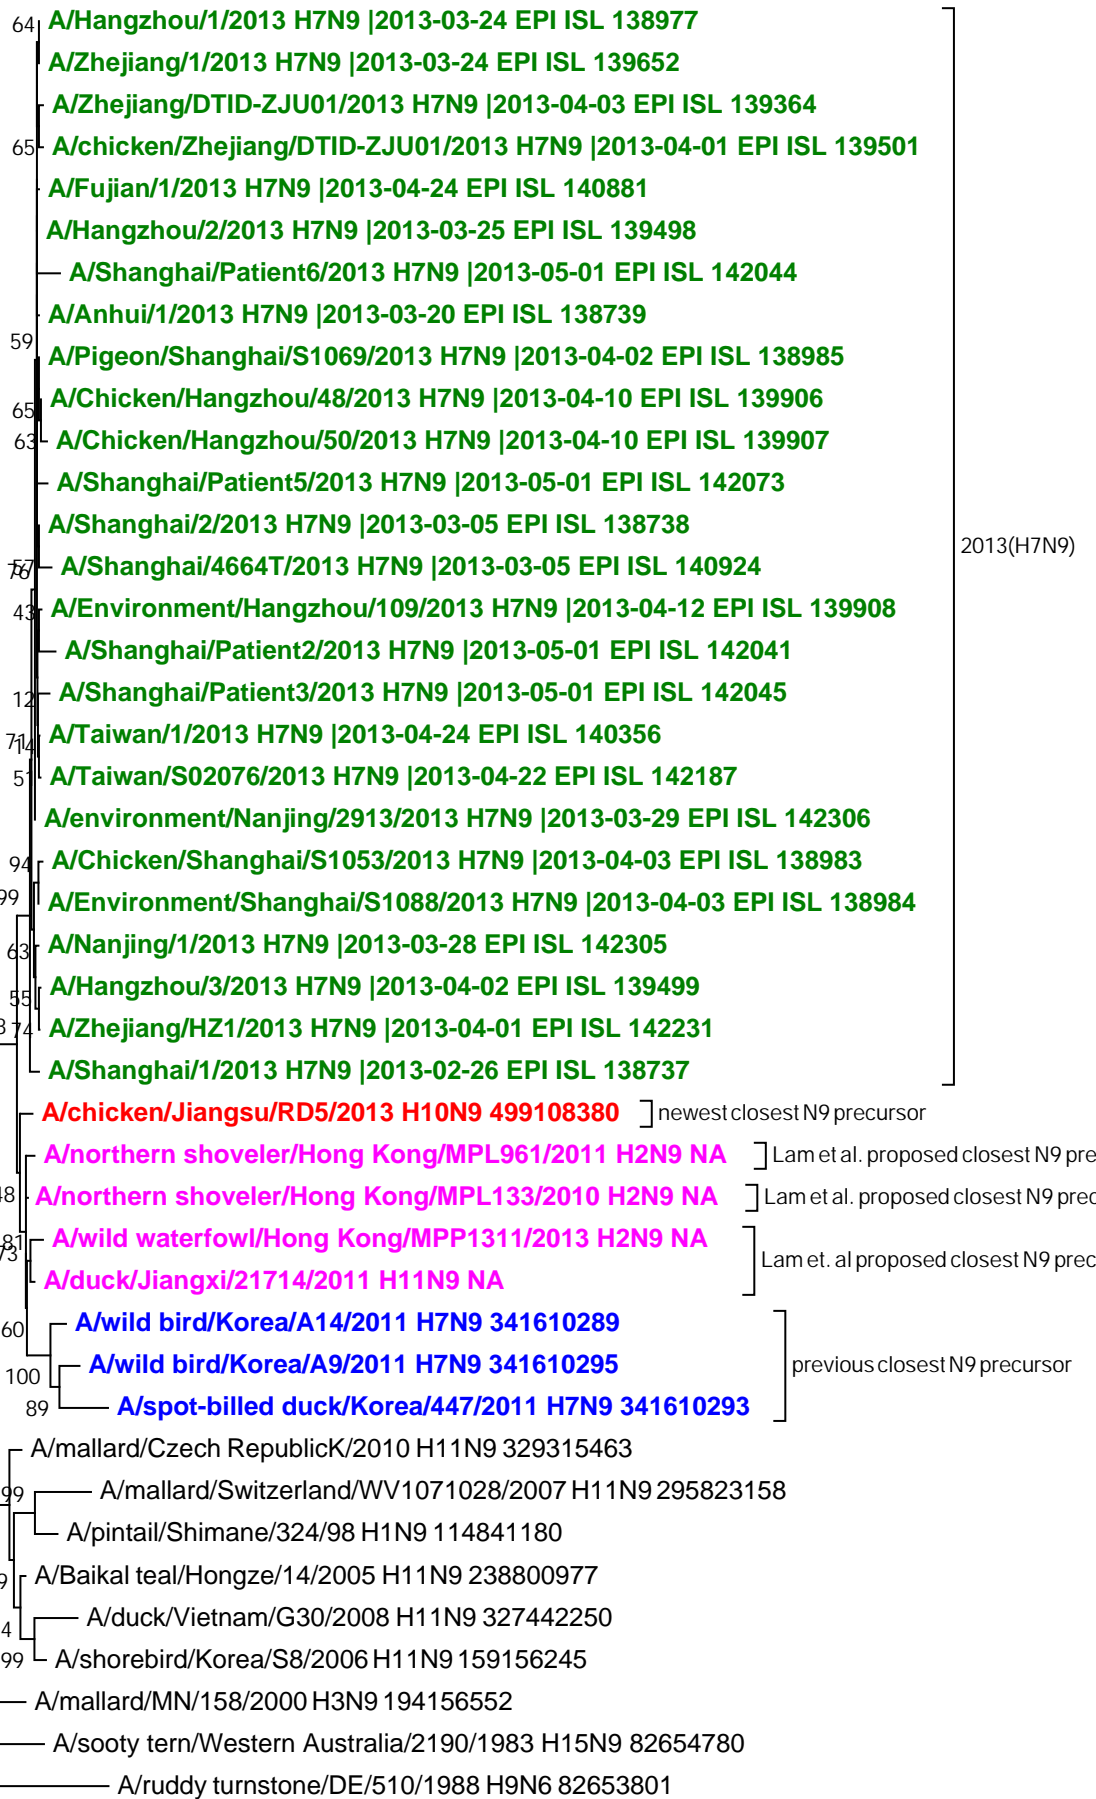

0.05

S1-B

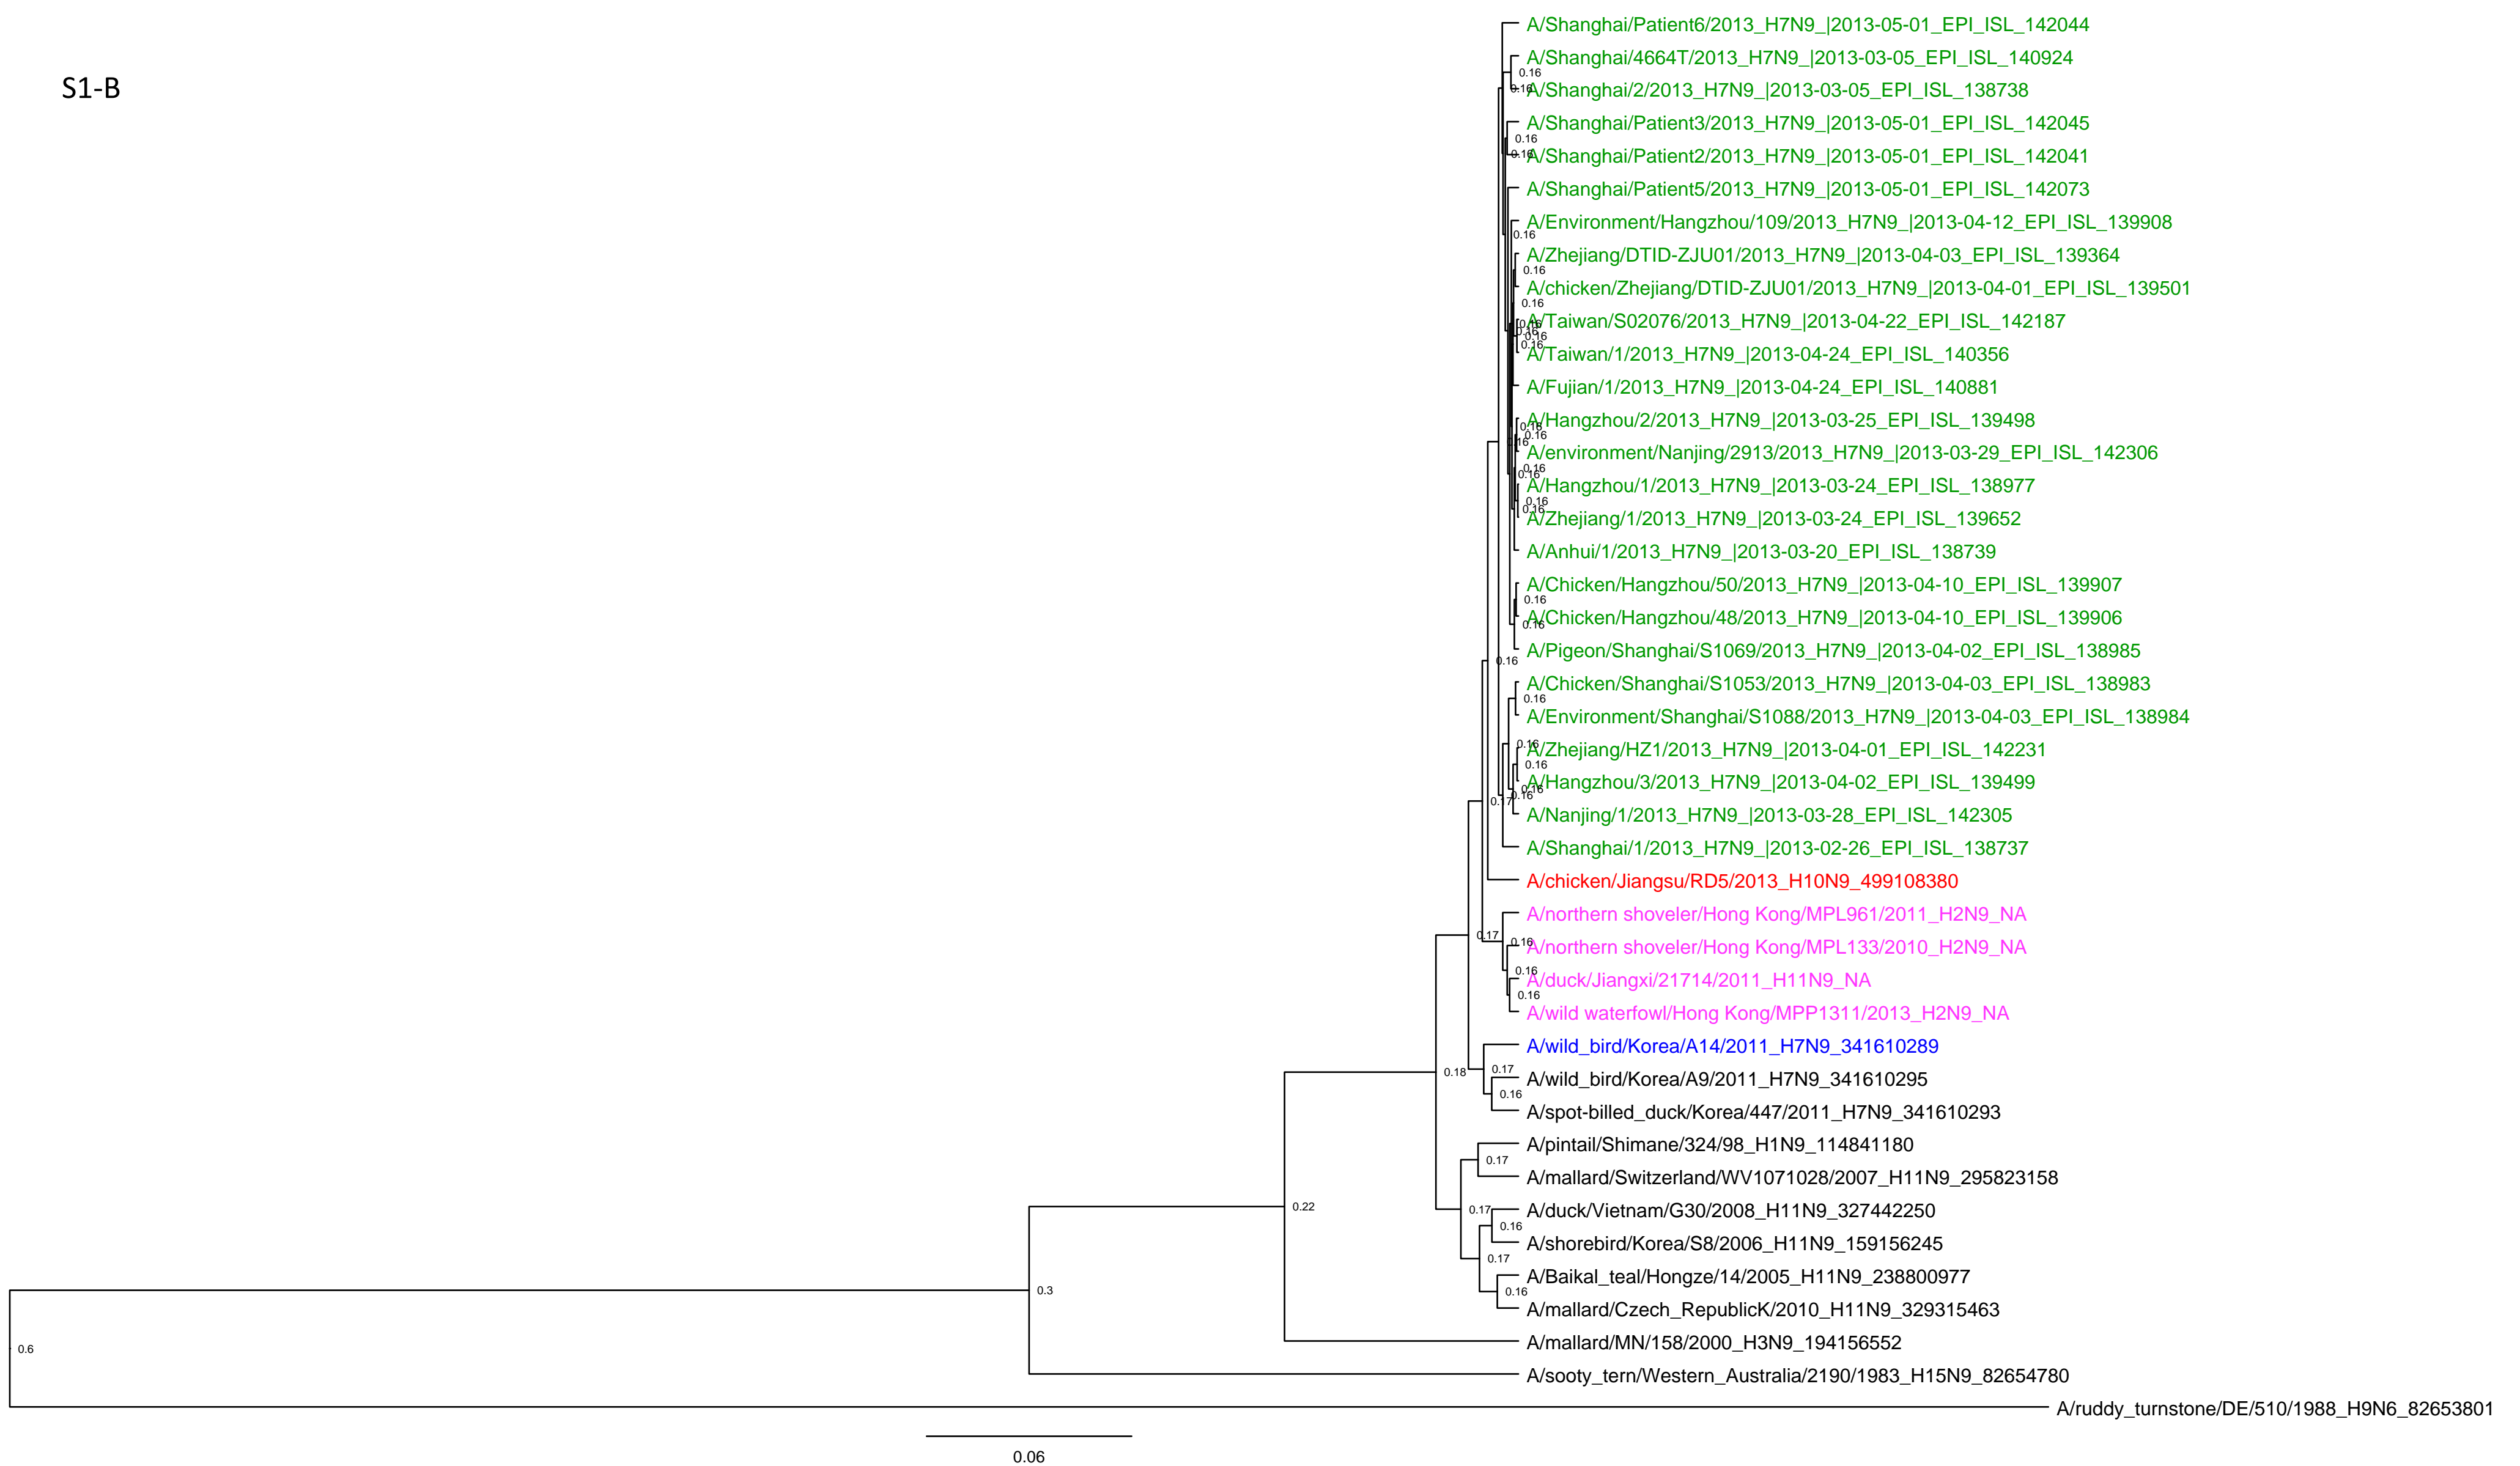

Supplement: 1745-6150-8-26-S1.pdf [file 1745-6150-8-26-S1.pdf]
