# Supplementary material for: A new piece in the puzzle of the novel avian-origin influenza A (H7N9) virus
Source: PubMed Central journal article supplement (PMC4016609; doi:10.1186/1745-6150-8-26), 2013-10-26
Supplement: 1745-6150-8-26-S2.pdf [file 1745-6150-8-26-S2.pdf]

# S2-A

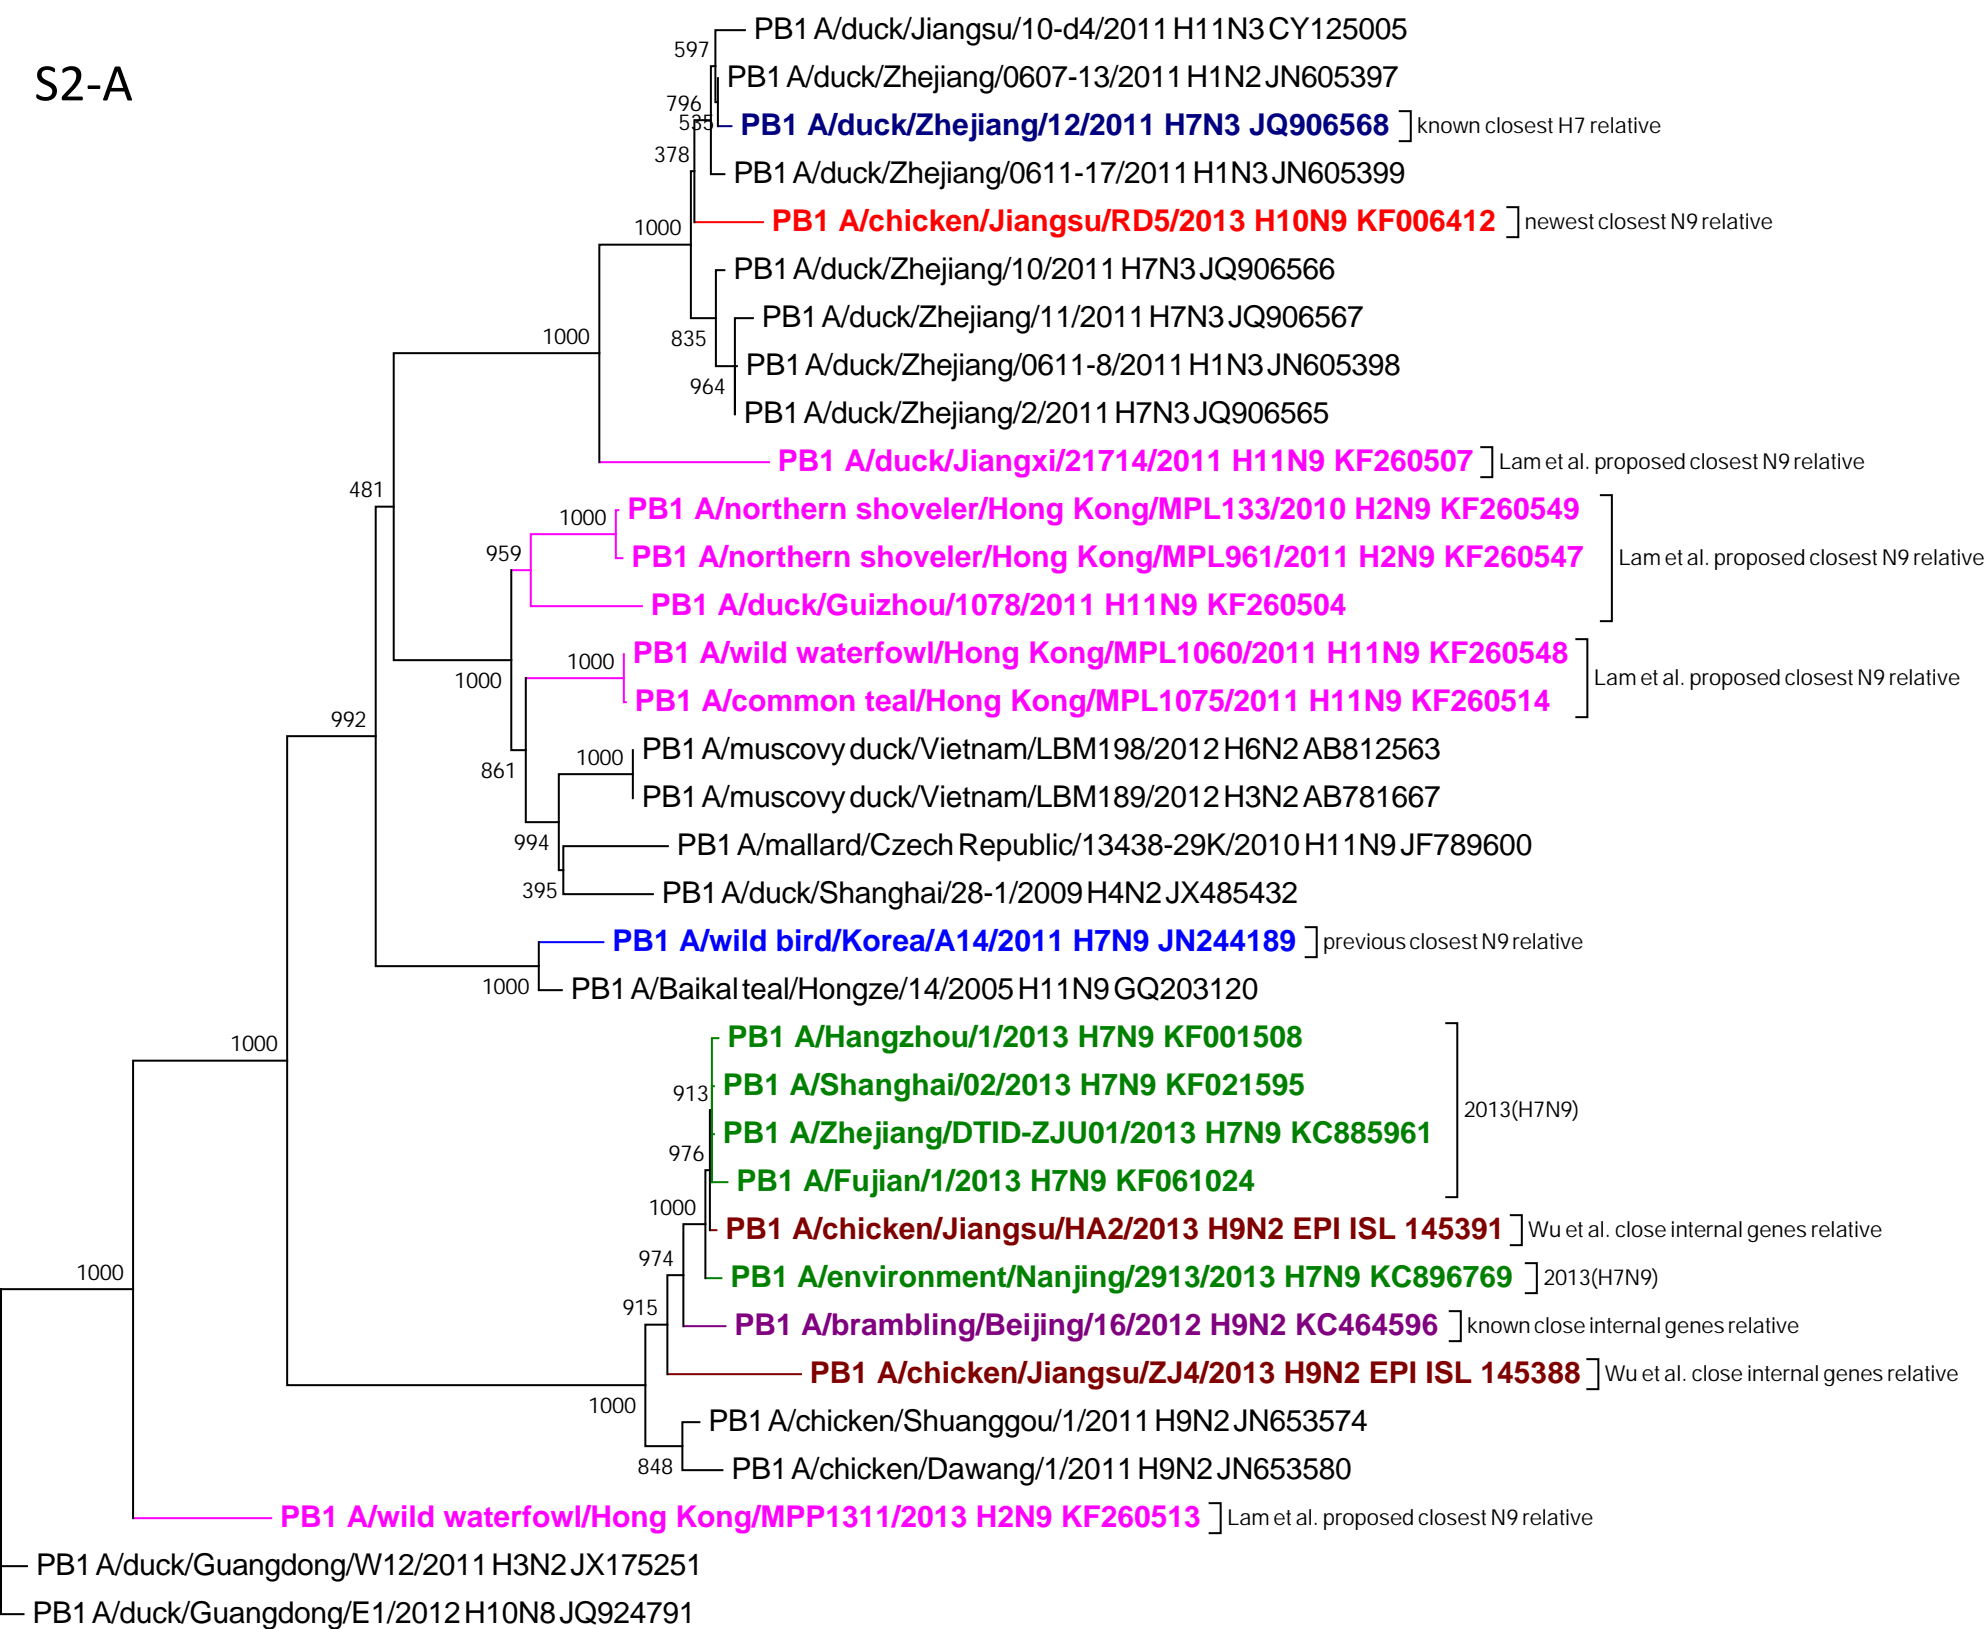

0.01

S2-B

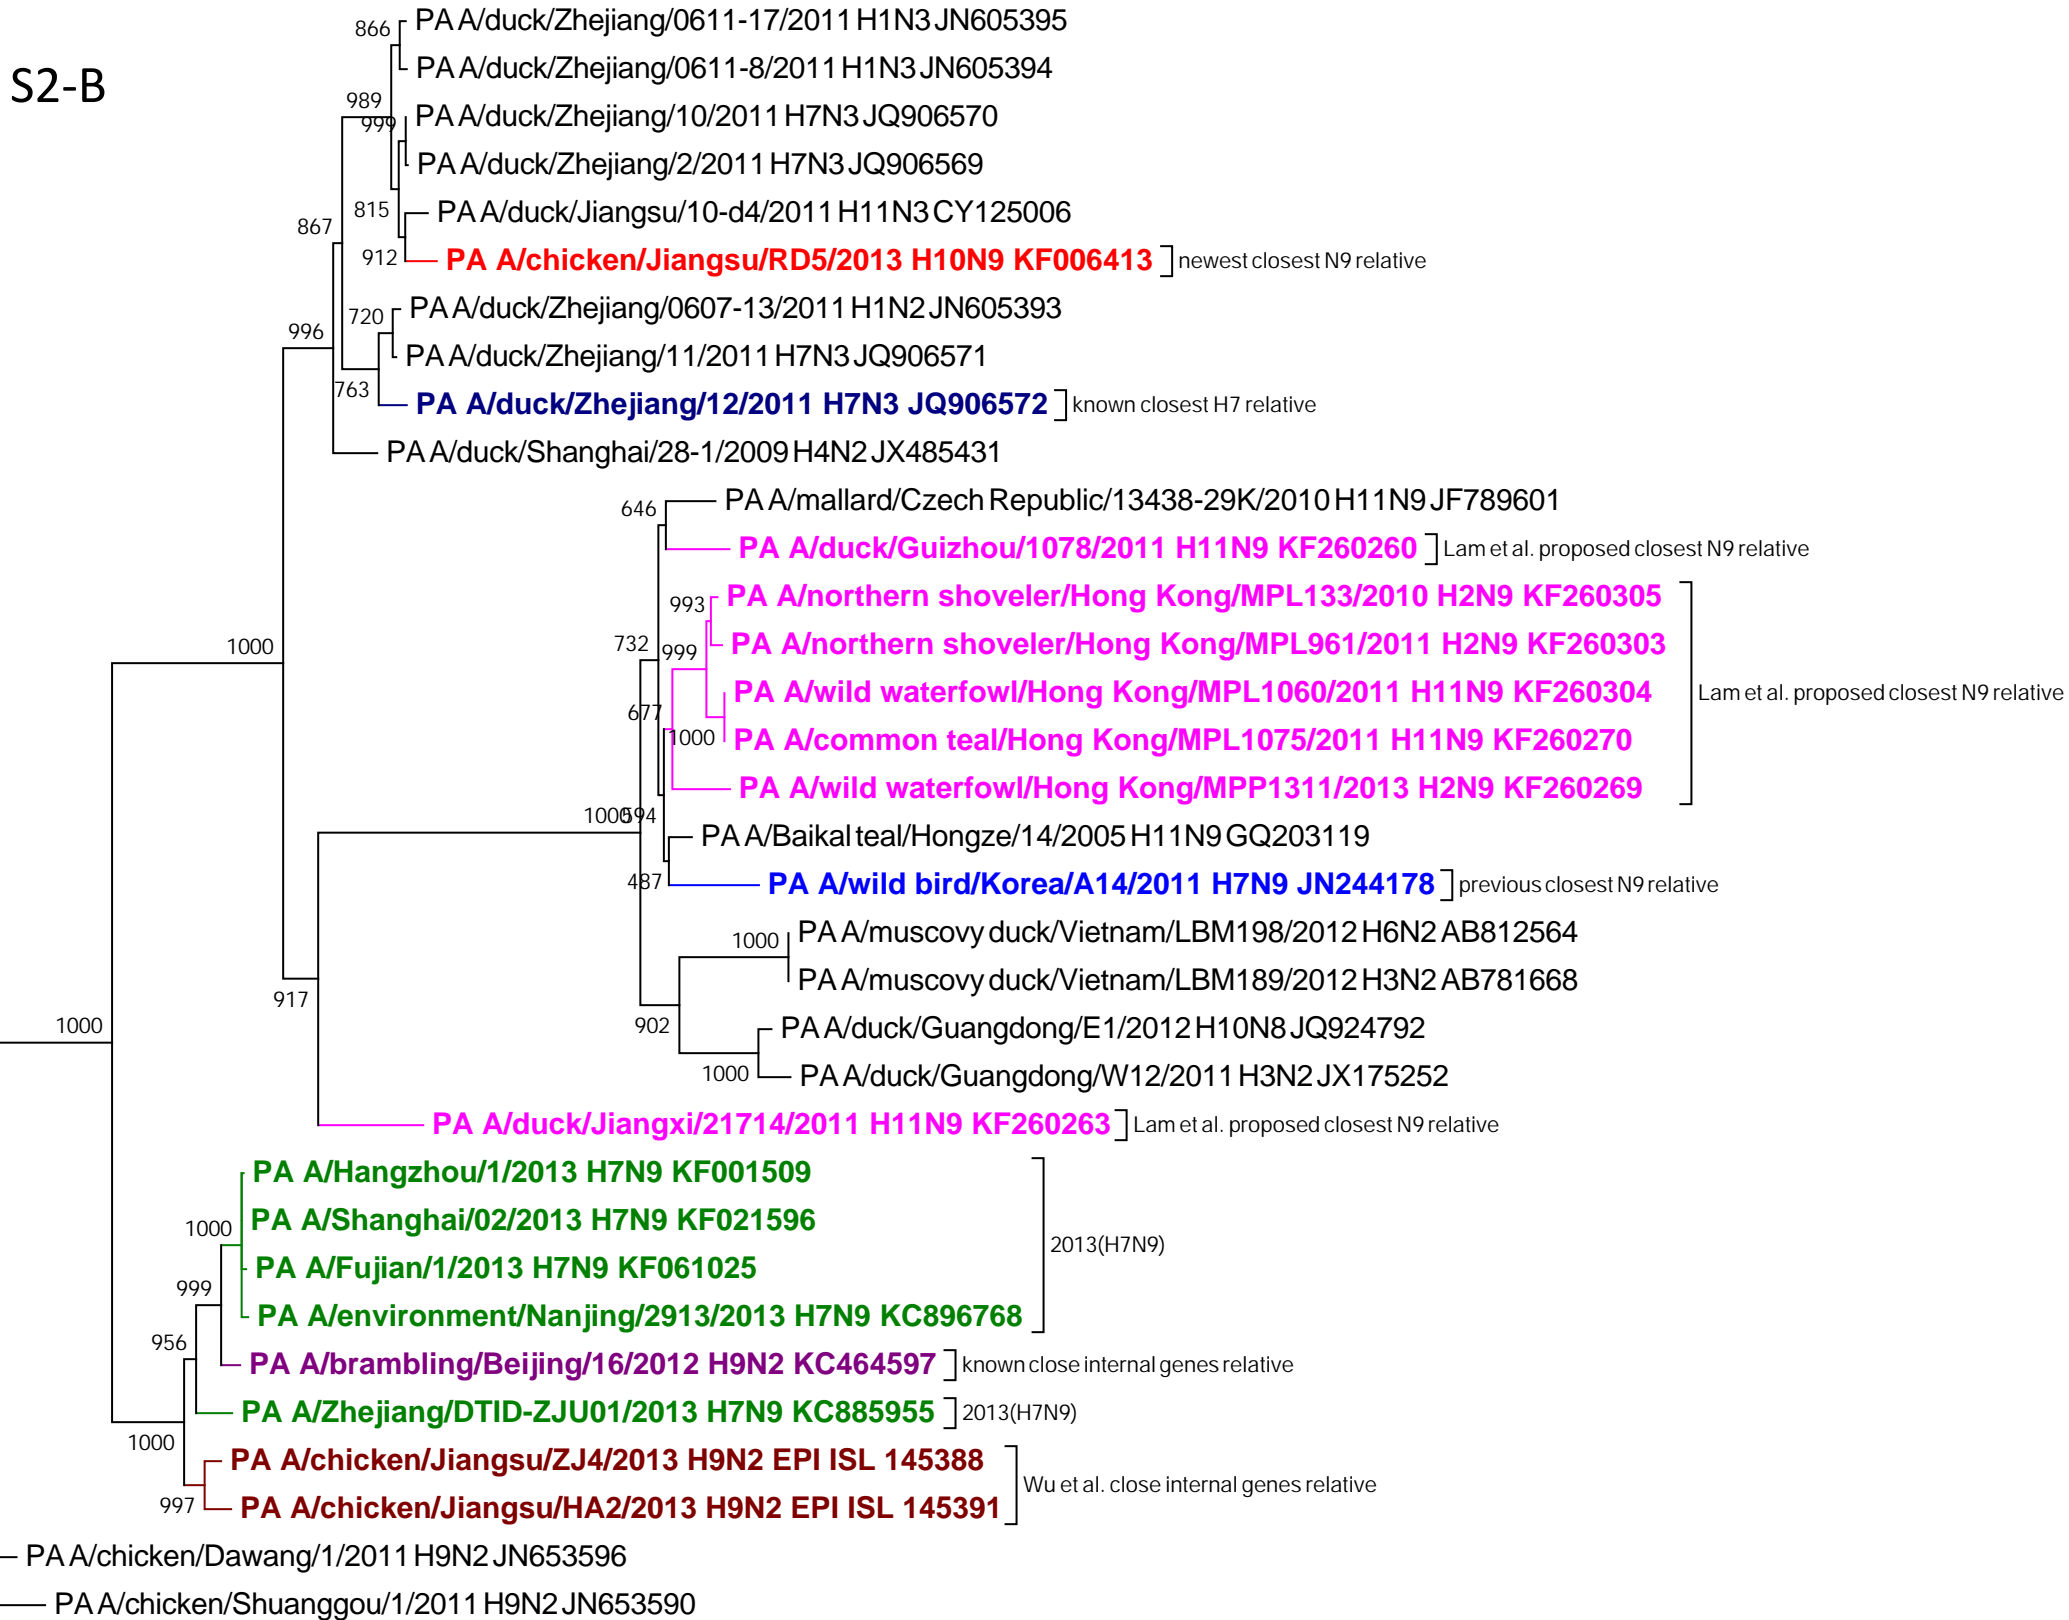

0.01

S2-C

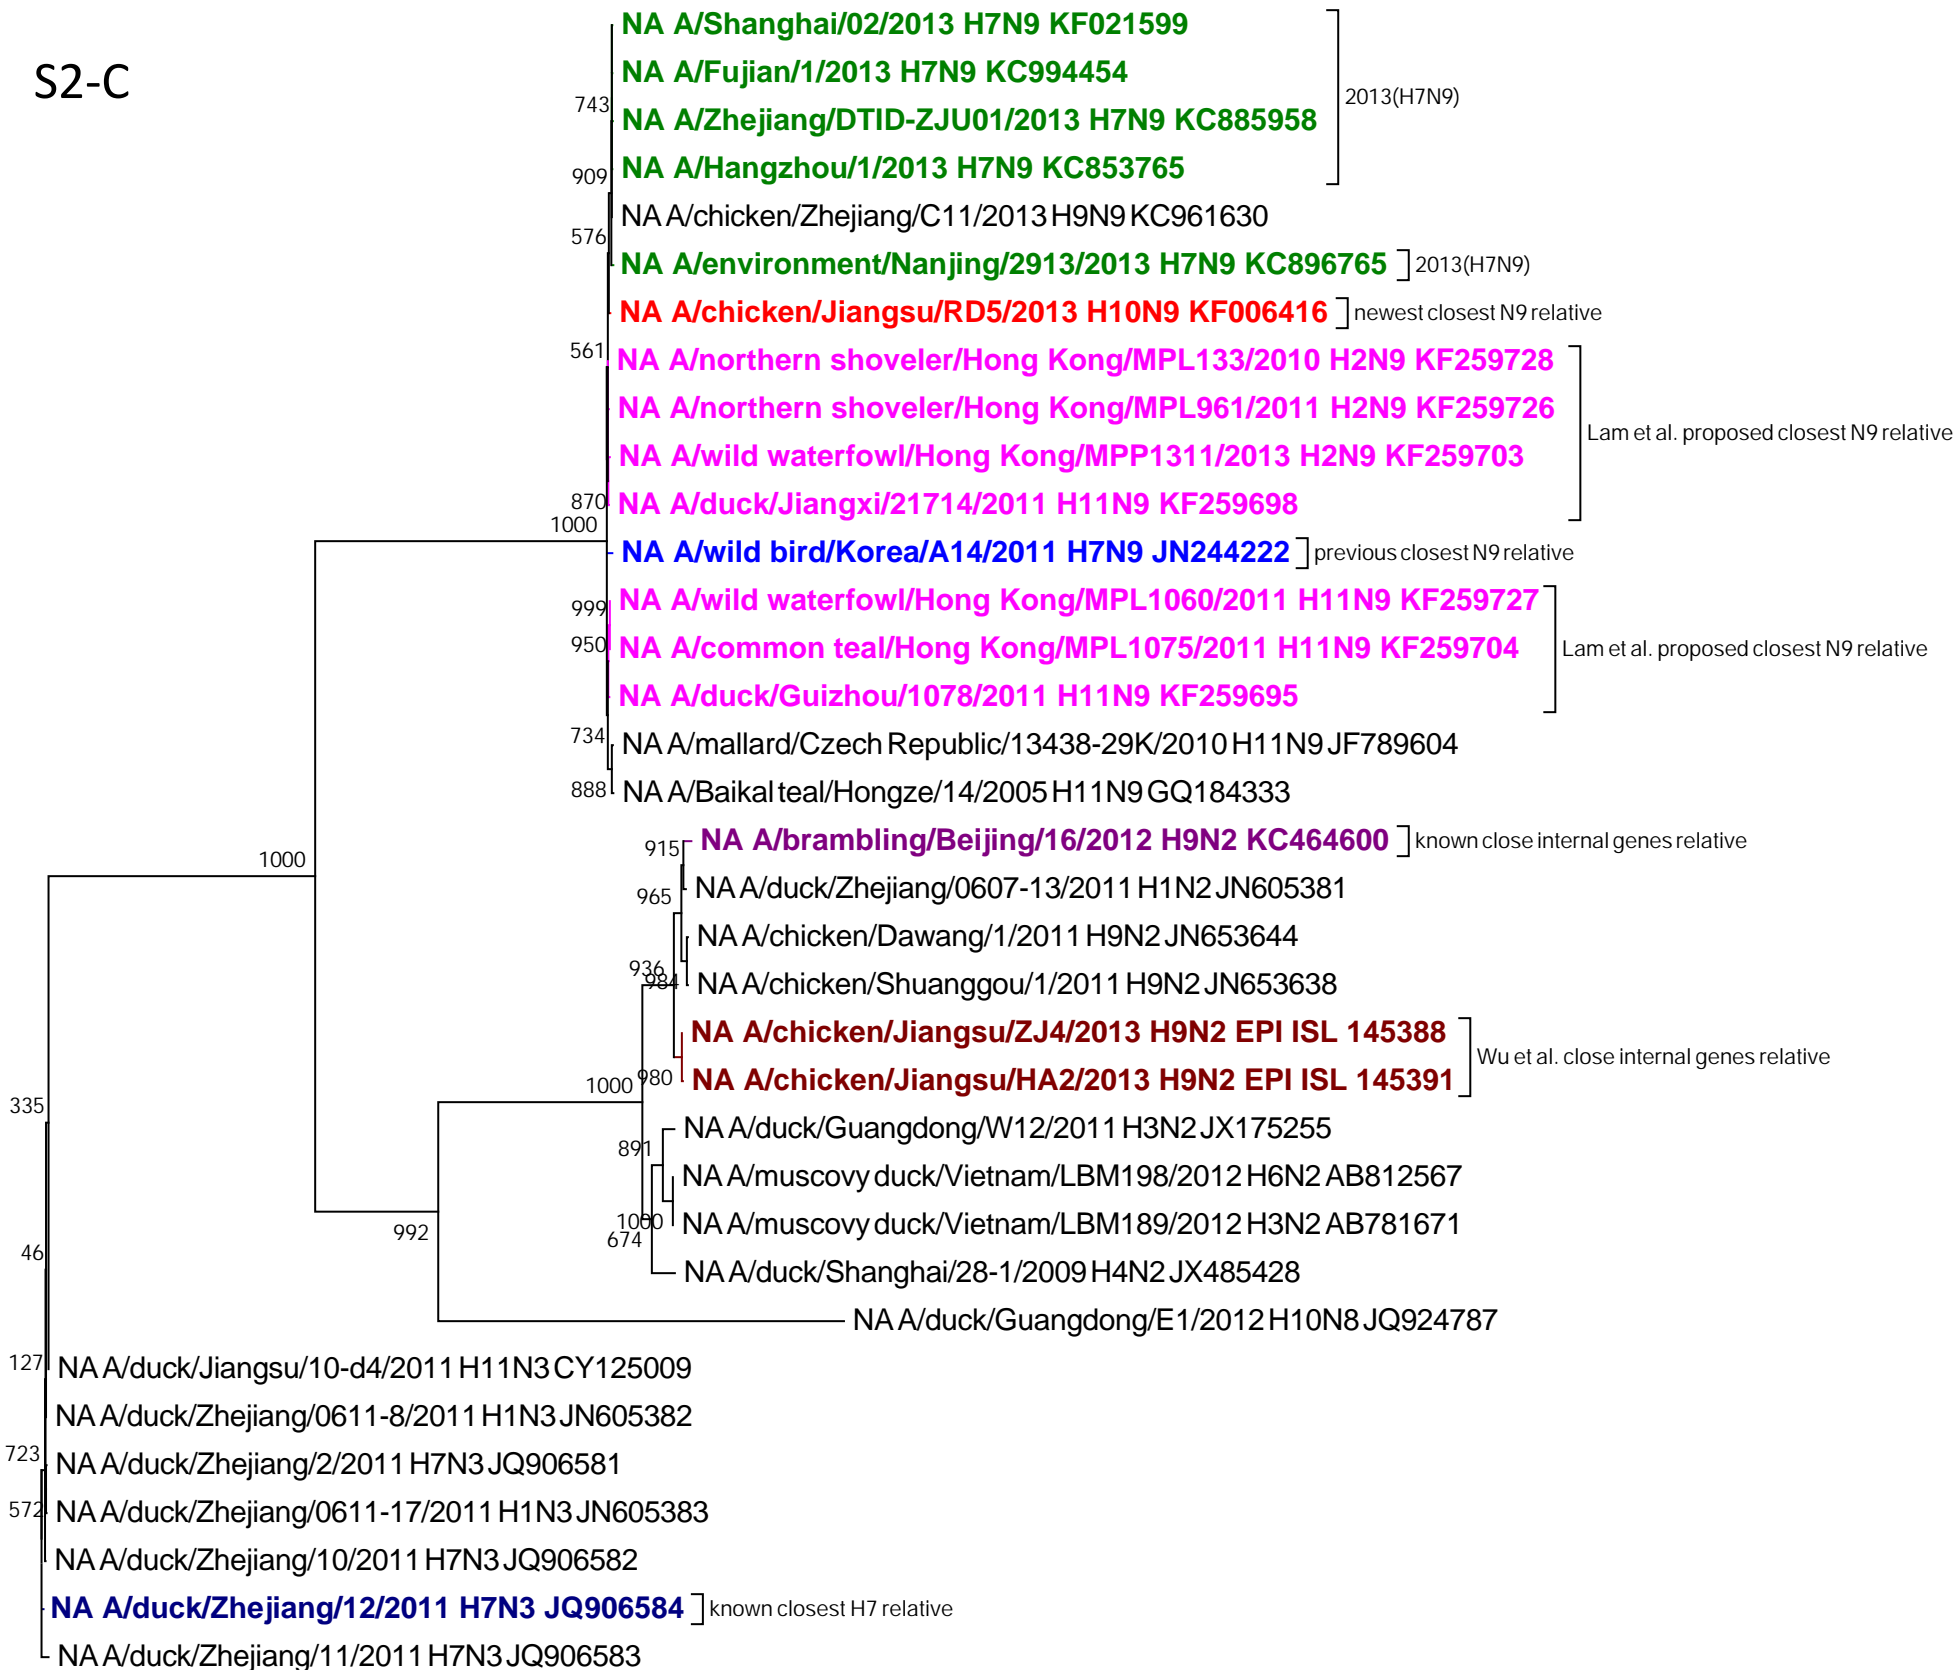

0.1

S2-D

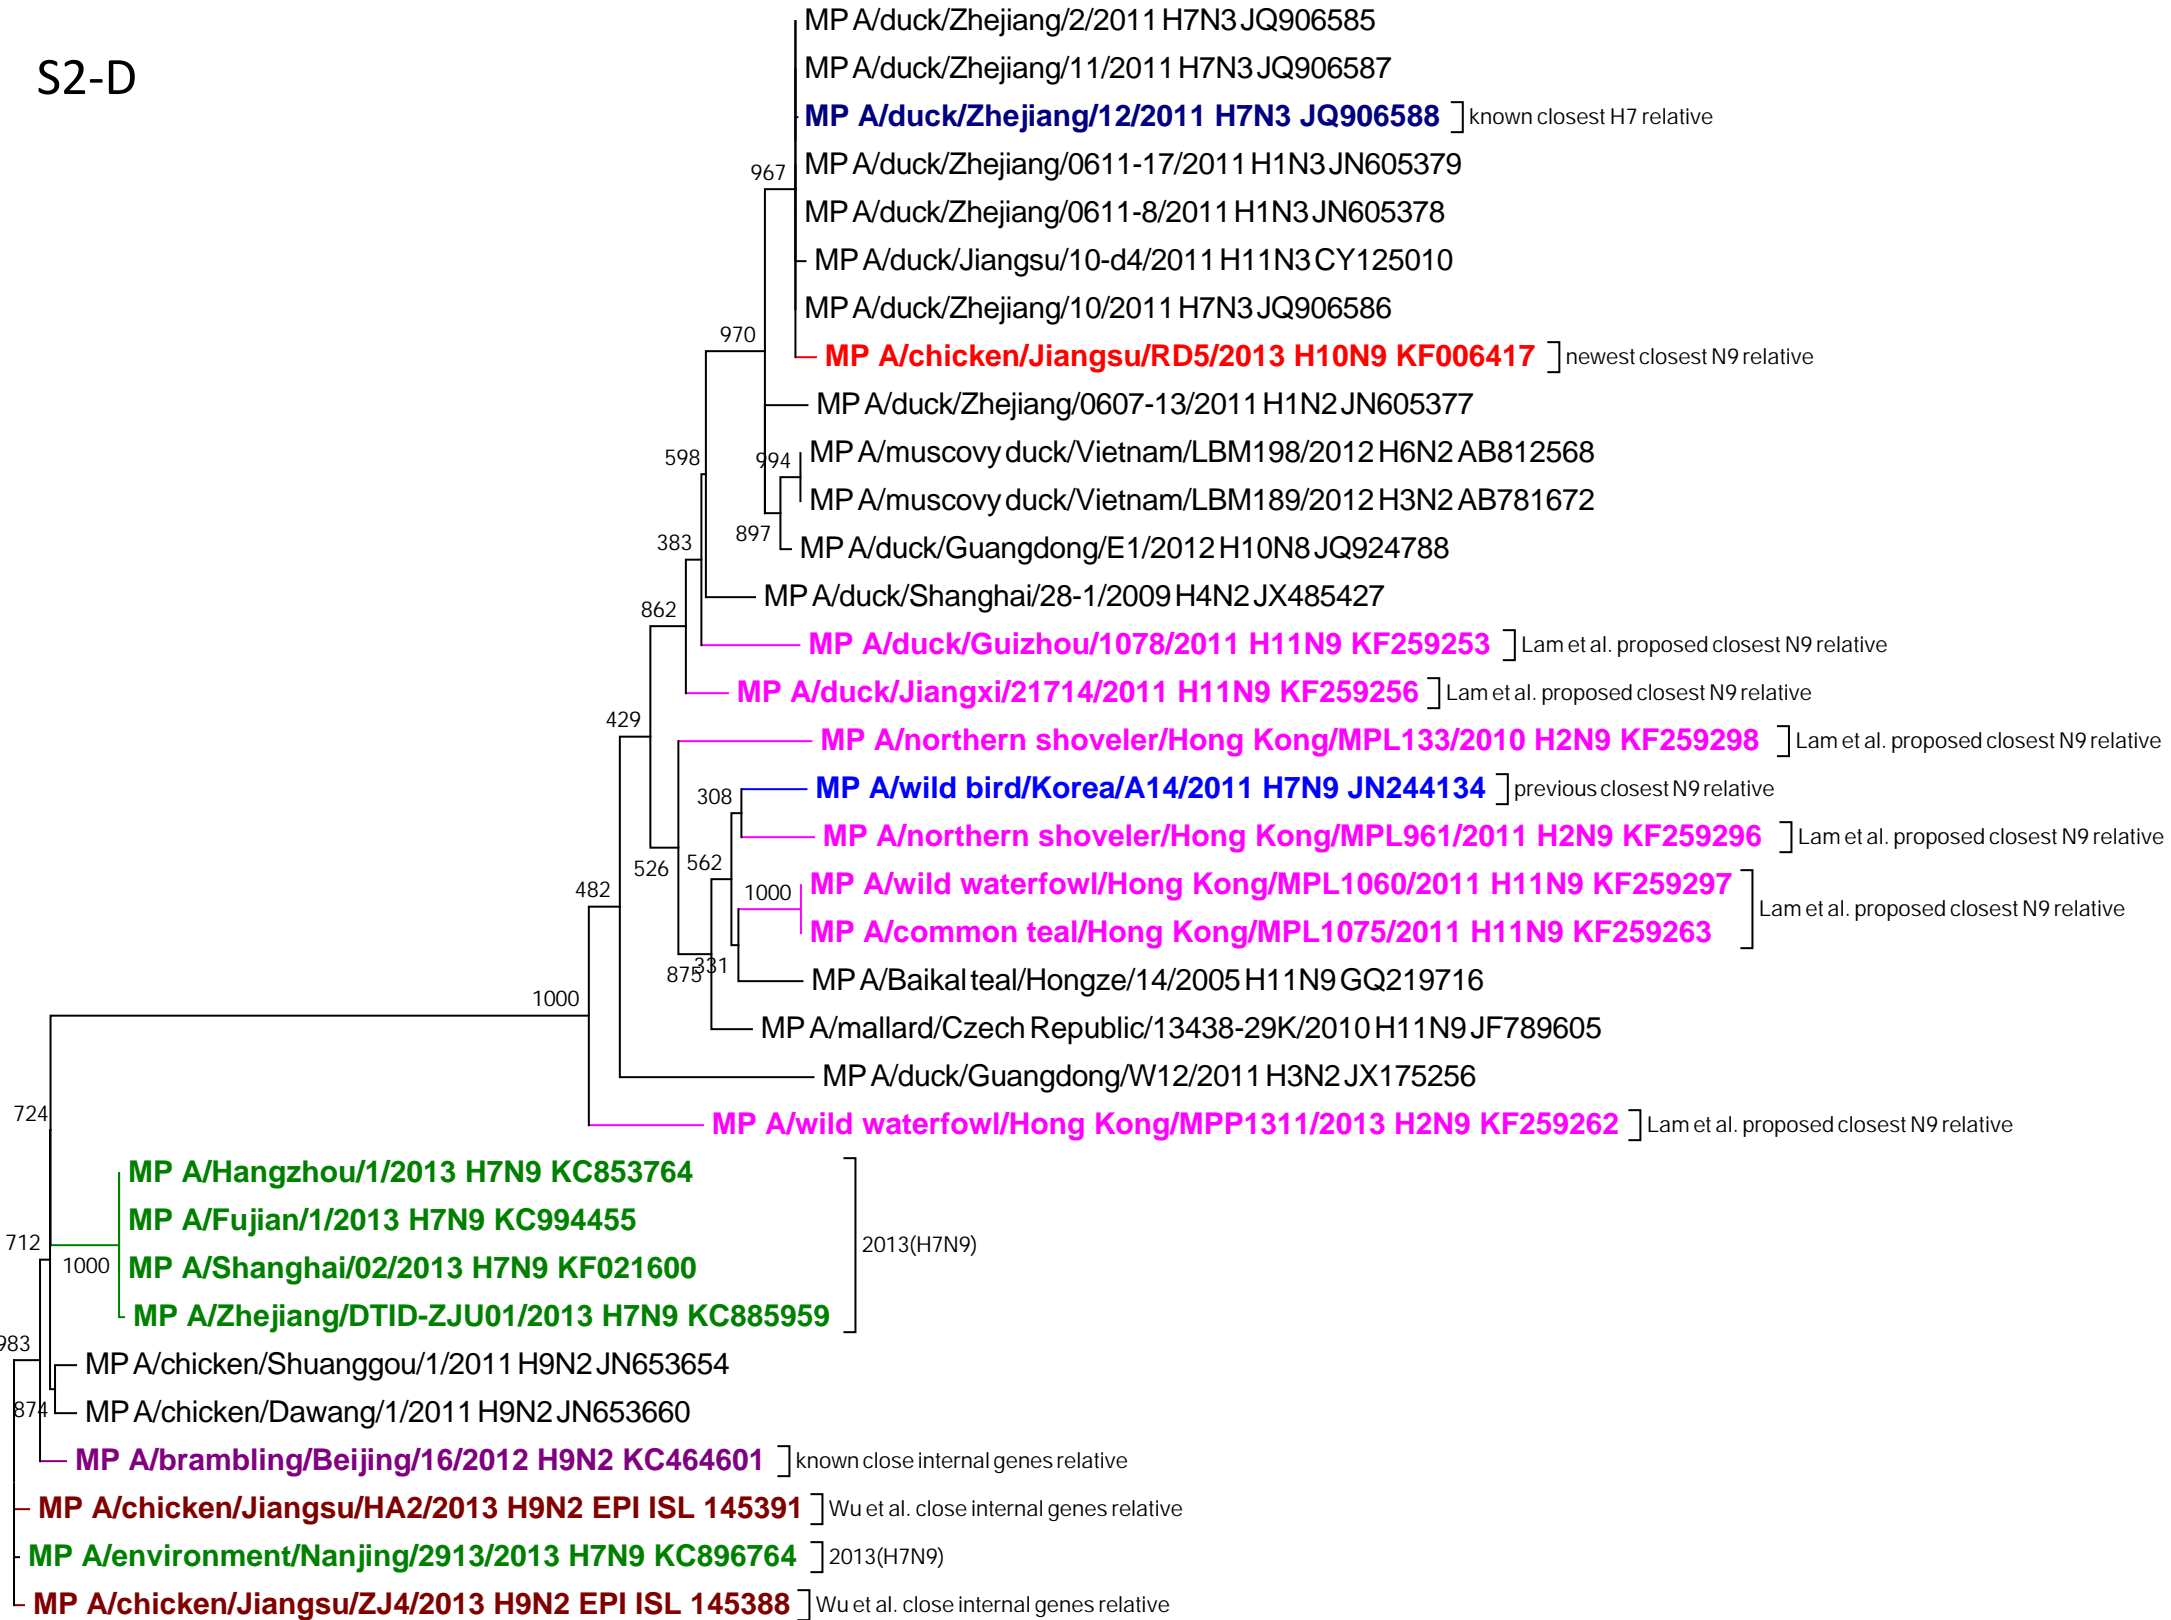

0.01

S2-E

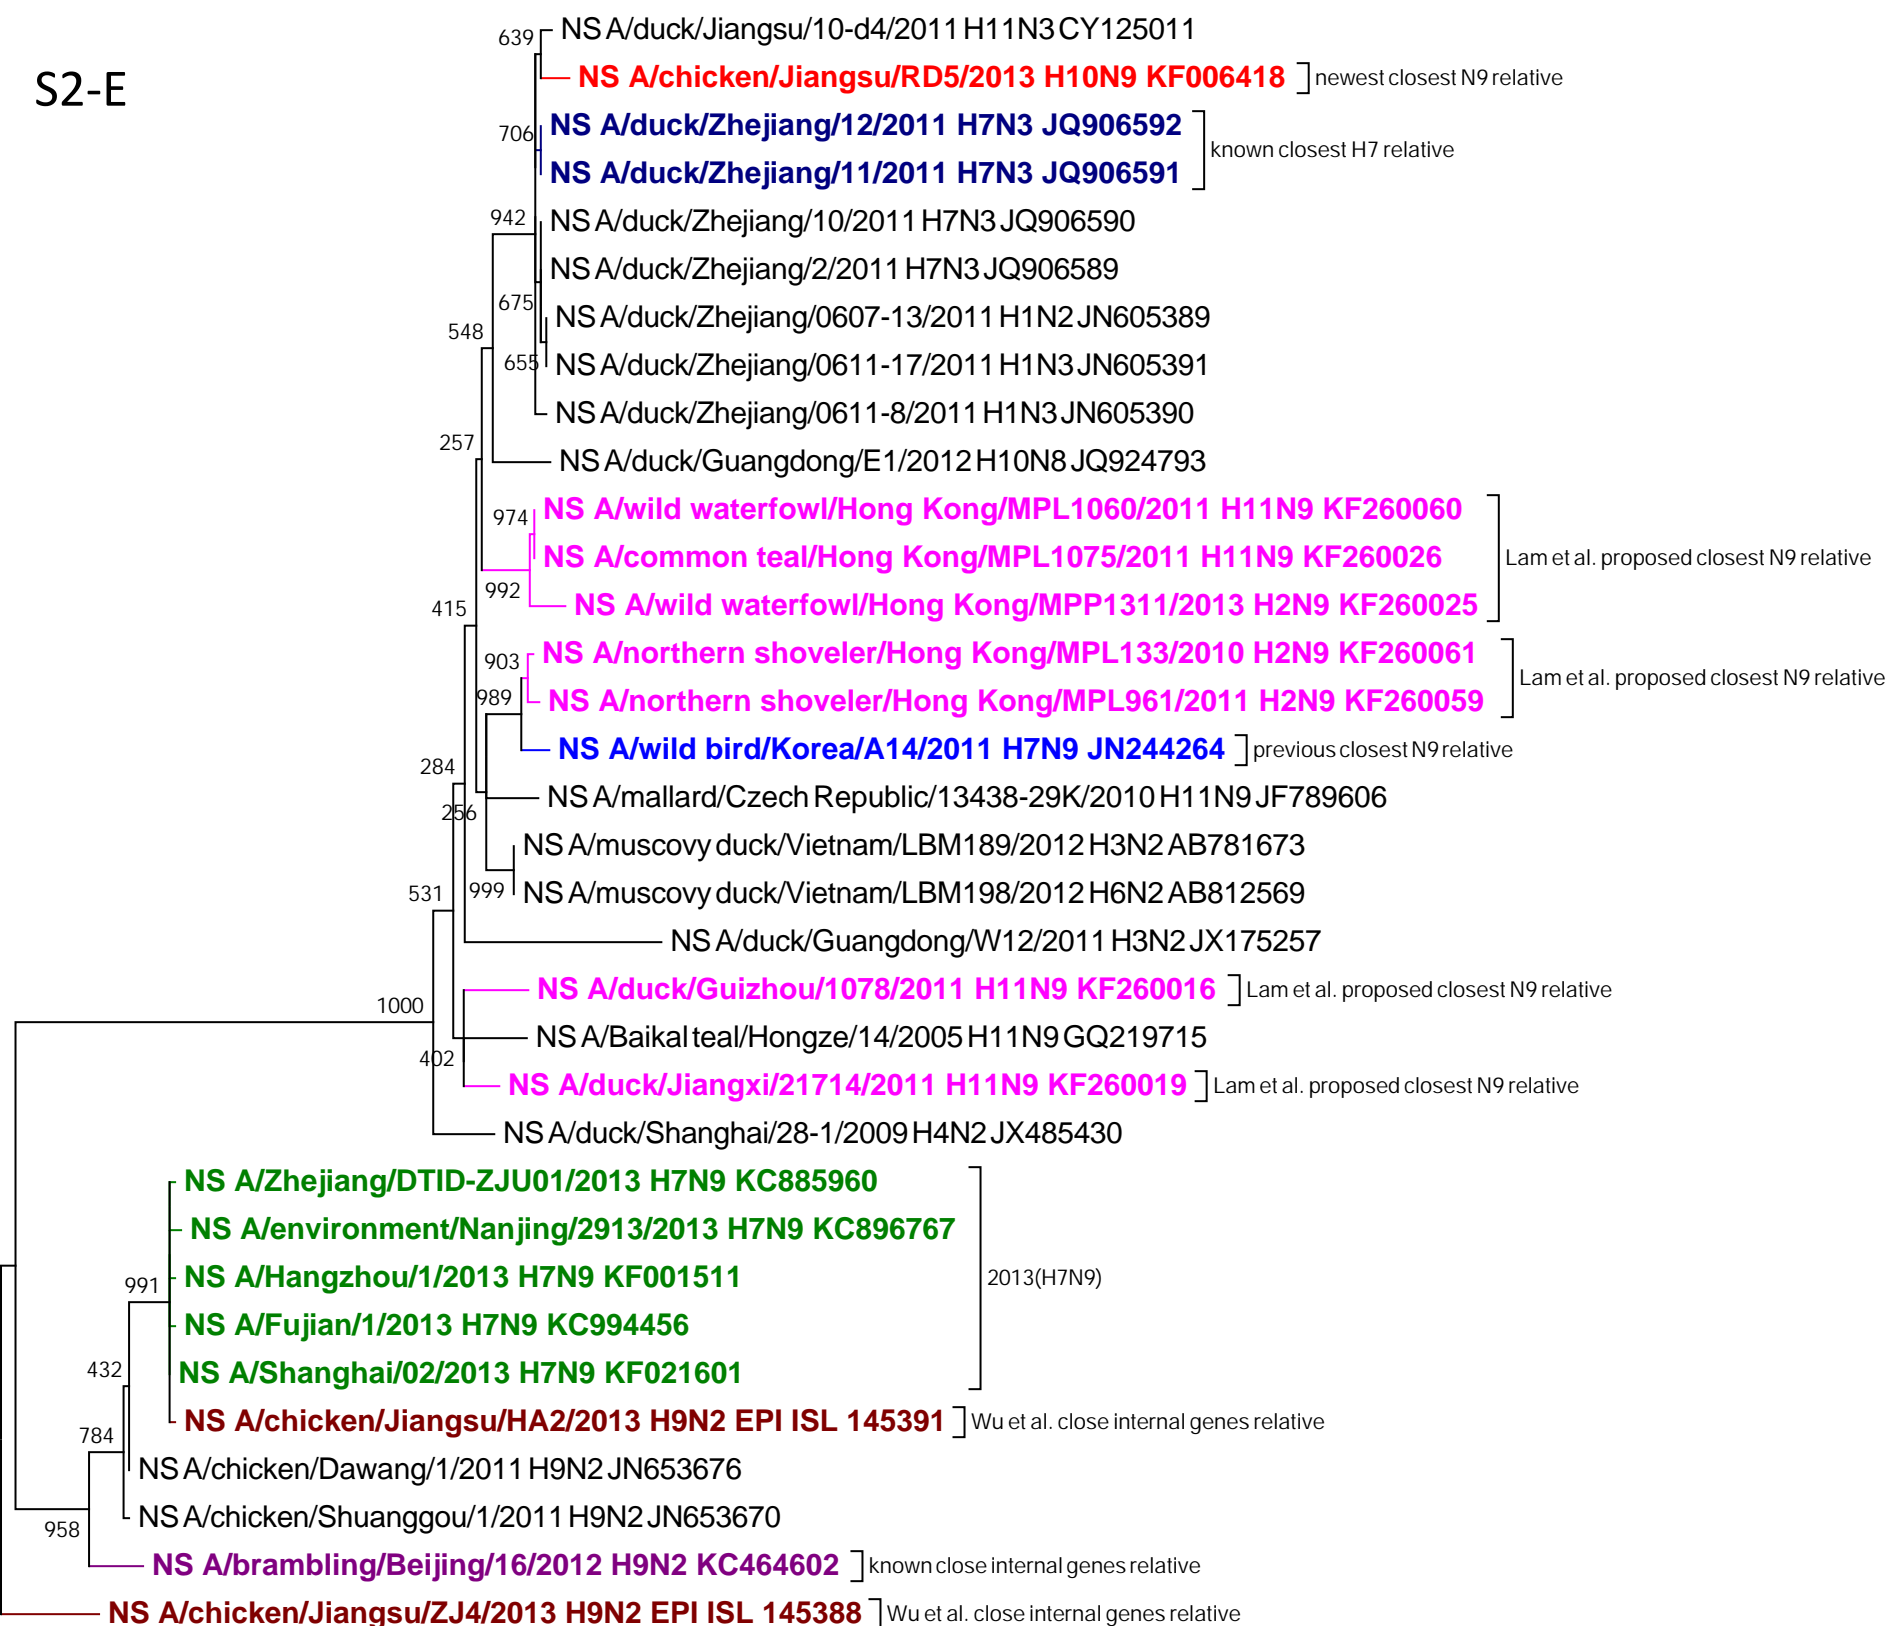

0.01

S2-F

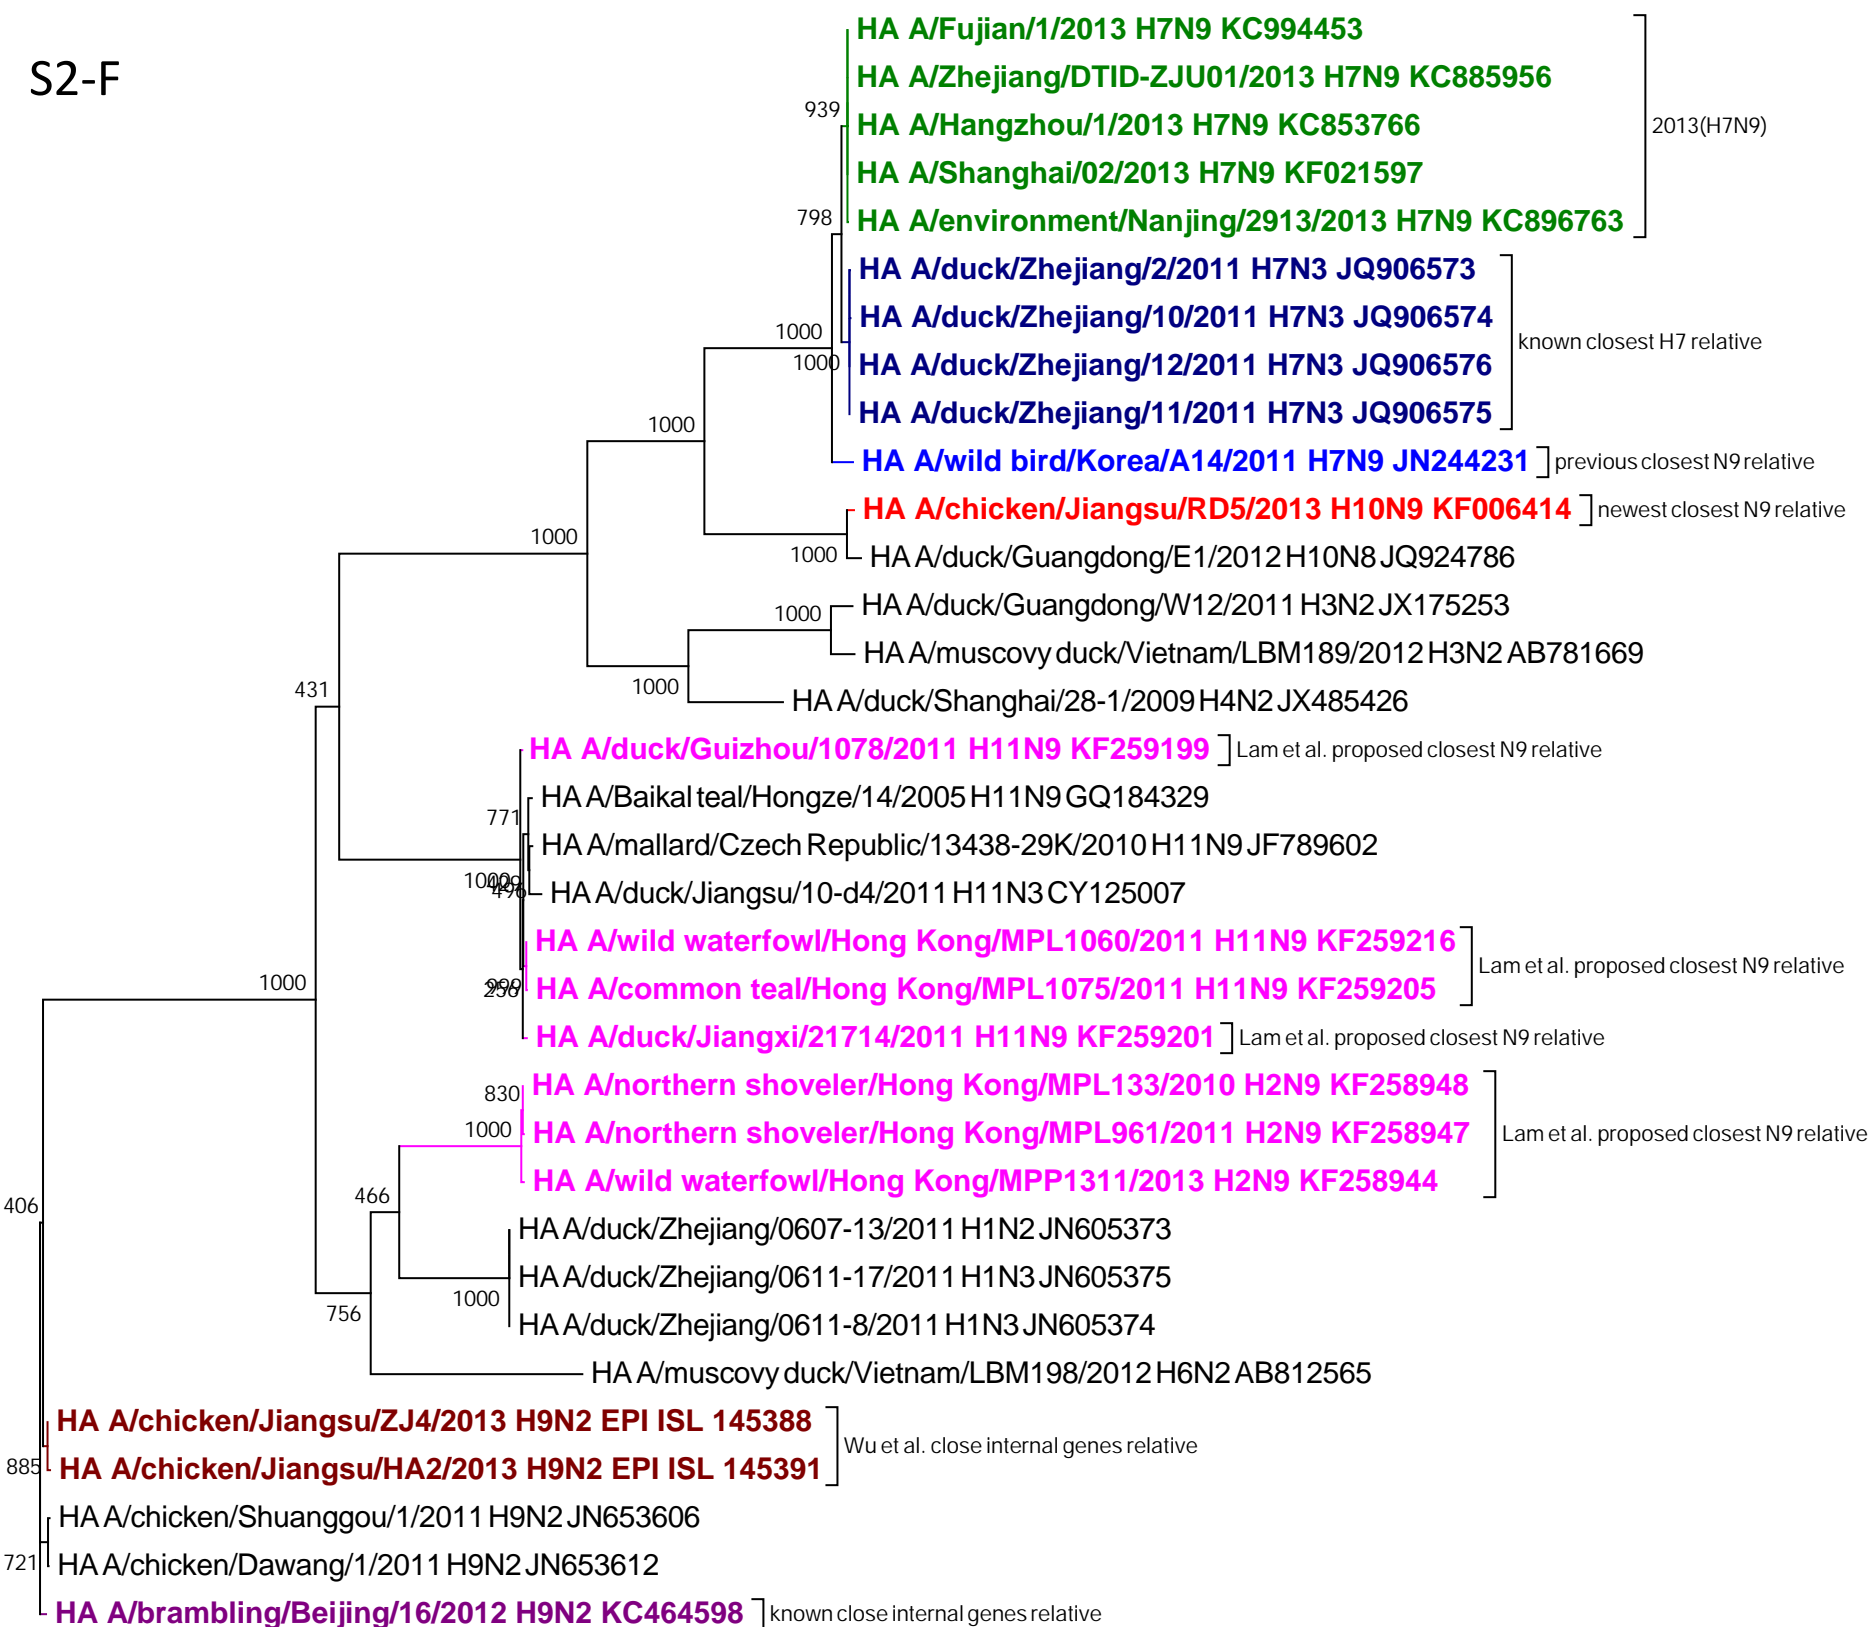

0.2
