# Supplementary material for: A new piece in the puzzle of the novel avian-origin influenza A (H7N9) virus
Source: PubMed Central journal article supplement (PMC4016609; doi:10.1186/1745-6150-8-26), 2013-10-26
Supplement: 1745-6150-8-26-S3.pdf [file 1745-6150-8-26-S3.pdf]

We acknowledge the authors, originating and submitting laboratories of the sequences from GISAID's EpiFlu™ Database on which this research is based. The list is detailed below.

All submitters of data may be contacted directly via the GISAID website [www.gisaid.org](http://www.gisaid.org)

| Segment ID | Segment | Country | Collection date | Isolate name                       | Originating Lab                                               | Submitting Lab                                                | Authors                                                                                                           |
|------------|---------|---------|-----------------|------------------------------------|---------------------------------------------------------------|---------------------------------------------------------------|-------------------------------------------------------------------------------------------------------------------|
| EPI440700  | NA      | China   | 2013-Apr-02     | A/Pigeon/Shanghai/S1069/2013       | Harbin Veterinary Research Institute                          | Harbin Veterinary Research Institute                          |                                                                                                                   |
| EPI453611  | NA      | China   | 2013-Mar-29     | A/environment/Nanjing/2913/2013    |                                                               | Other Database Import                                         | Bao,C.; Cui,L.; Zhou,M.; Guo,X.; Hong,L.; Gao,G.F.; Wang,H.; Qi,X.; Ge,Y.; Zhao,K.; Li,W.; Tang,F.; Shi,Z.; Li,Y. |
| EPI440692  | NA      | China   | 2013-Apr-03     | A/Environment/Shanghai/S1088/2013  | Harbin Veterinary Research Institute                          | Harbin Veterinary Research Institute                          |                                                                                                                   |
| EPI443677  | NA      | China   | 2013-Apr-12     | A/Environment/Hangzhou/109/2013    | Hangzhou Center for Disease Control and Prevention            | Hangzhou Center for Disease Control and Prevention            | Li,J;Yu,XF;Pu,XY;Xie,L;Sun,YX;Xiao,HX;Wang,FJ;Din,H;Wu,Y;Liu,D;Zhao,GQ;Liu,J;Pan,JC                               |
| EPI445914  | NA      | Taiwan  | 2013-Apr-24     | A/Taiwan/1/2013                    | National Influenza Center, Centers for Disease Control        | Taiwan CDC                                                    | Ji-Rong, Yang; Ming-Tsan, Liu; Ho-Sheng, Wu                                                                       |
| EPI451333  | NA      | China   | 2013-May-01     | A/Shanghai/Patient5/2013           | Shanghai public health clinical center                        | Institute Pasteur of Shanghai, CAS                            |                                                                                                                   |
| EPI451325  | NA      | China   | 2013-May-01     | A/Shanghai/Patient3/2013           | Shanghai public health clinical center                        | Institute Pasteur of Shanghai, CAS                            |                                                                                                                   |
| EPI451274  | NA      | China   | 2013-May-01     | A/Shanghai/Patient6/2013           | Shanghai public health clinical center                        | Institute Pasteur of Shanghai, CAS                            |                                                                                                                   |
| EPI451255  | NA      | China   | 2013-May-01     | A/Shanghai/Patient2/2013           | Shanghai public health clinical center                        | Institute Pasteur of Shanghai, CAS                            |                                                                                                                   |
| EPI443036  | NA      | China   | 2013-Mar-24     | A/Zhejiang/1/2013                  | Zhejiang Provincial Center for Disease Control and Prevention | Zhejiang Provincial Center for Disease Control and Prevention | Sun, Y; Zhang, YJ                                                                                                 |
| EPI442714  | NA      | China   | 2013-Apr-02     | A/Hangzhou/3/2013                  | Hangzhou Center for Disease Control and Prevention            | Hangzhou Center for Disease Control and Prevention            | Jing-Cao, Pan                                                                                                     |
| EPI442711  | NA      | China   | 2013-Mar-25     | A/Hangzhou/2/2013                  | Hangzhou Center for Disease Control and Prevention            | Hangzhou Center for Disease Control and Prevention            | Jing-Cao, Pan                                                                                                     |
| EPI440096  | NA      | China   | 2013-Mar-24     | A/Hangzhou/1/2013                  | Hangzhou Center for Disease Control and Prevention            | Hangzhou Center for Disease Control and Prevention            | Li,J; Sun,YX; Pu,XY; Yu,XF; Chen,QJ; Kou,Y; Ding,SJ; Zhou,YY; Pan,JC                                              |
| EPI453477  | NA      | China   | 2013-Apr-01     | A/Zhejiang/HZ1/2013                |                                                               | Other Database Import                                         | Wu,H.; Wu,N.; Guo,C.                                                                                              |
| EPI446747  | NA      | China   | 2013-Apr-24     | A/Fujian/1/2013                    |                                                               | Other Database Import                                         | Weng,Y.; Zhang,Y.; Xie,J.; Huang,M.; Chen,W.; He,W.; Wu,B.; Wang,J.; Yang,S.; Zheng,K.; Yan,Y.                    |
| EPI441797  | NA      | China   | 2013-Apr-03     | A/Zhejiang/DTID-ZJU01/2013         |                                                               | Other Database Import                                         | Chen,H.-L.; Yuen,K.-Y.; Chen,Y.; Wu,N.P.; Yang,S.G.; Wo,J.E.; Yao,H.P.; Liang,W.F.; Cui,D.W.; Wu,H.B.; Li,L.J.    |
| EPI453606  | NA      | China   | 2013-Mar-28     | A/Nanjing/1/2013                   |                                                               | Other Database Import                                         | Bao,C.; Cui,L.; Zhou,M.; Guo,X.; Hong,L.; Gao,G.F.; Wang,H.; Qi,X.; Ge,Y.; Zhao,K.; Li,W.; Tang,F.; Shi,Z.; Li,Y. |
| EPI452262  | NA      | Taiwan  | 2013-Apr-22     | A/Taiwan/S0207/6/2013              |                                                               | Other Database Import                                         | Chang,S.-C.; Chang,S.-Y.                                                                                          |
| EPI446965  | NA      | China   | 2013-Mar-05     | A/Shanghai/4664T/2013              |                                                               | Other Database Import                                         | Hu,Y.                                                                                                             |
| EPI439509  | NA      | China   | 2013-Mar-20     | A/Anhui/1/2013                     |                                                               | WHO Chinese National Influenza Center                         |                                                                                                                   |
| EPI439500  | NA      | China   | 2013-Mar-05     | A/Shanghai/2/2013                  |                                                               | WHO Chinese National Influenza Center                         |                                                                                                                   |
| EPI439487  | NA      | China   | 2013-Feb-26     | A/Shanghai/1/2013                  |                                                               | WHO Chinese National Influenza Center                         |                                                                                                                   |
| EPI443669  | NA      | China   | 2013-Apr-10     | A/Chicken/Hangzhou/50/2013         | Hangzhou Center for Disease Control and Prevention            | Hangzhou Center for Disease Control and Prevention            | Li,J;Yu,XF;Pu,XY;Xie,L;Sun,YX;Xiao,HX;Wang,FJ;Din,H;Wu,Y;Liu,D;Zhao,GQ;Liu,J;Pan,JC                               |
| EPI443661  | NA      | China   | 2013-Apr-10     | A/Chicken/Hangzhou/48/2013         | Hangzhou Center for Disease Control and Prevention            | Hangzhou Center for Disease Control and Prevention            | Li,J;Yu,XF;Pu,XY;Xie,L;Sun,YX;Xiao,HX;Wang,FJ;Din,H;Wu,Y;Liu,D;Zhao,GQ;Liu,J;Pan,JC                               |
| EPI442723  | NA      | China   | 2013-Apr-01     | A/chicken/Zhejiang/DTID-ZJU01/2013 |                                                               | Other Database Import                                         | Wu,H.; Wu,N.; Yao,H.; Chen,H.; Song,W.; Wang,P.; Zheng,M.; Lau,S.; Li,L.                                          |
| EPI440684  | NA      | China   | 2013-Apr-03     | A/Chicken/Shanghai/S1053/2013      | Harbin Veterinary Research Institute                          | Harbin Veterinary Research Institute                          |                                                                                                                   |
| EPI466481  | NA      | China   | 2013-Apr-05     | A/chicken/Jiangsu/HA2/2013         | Yangzhou University                                           | Chinese Academy of Sciences                                   | Daxin, P                                                                                                          |
| EPI466457  | NA      | China   | 2013-Jan-23     | A/chicken/Jiangsu/ZJ4/2013         | Yangzhou University                                           | Chinese Academy of Sciences                                   | Daxin, P                                                                                                          |
